# Supplementary material for: Supporting mental health self-care discovery through a chatbot
Source: Frontiers journal article supplement (doi:10.3389/fdgth.2023.1034724), 2023-03-07
Supplement: Table_1.DOCX [file Table_1.DOCX]

\begin{table}[h!]

\caption{Questions of the `trust in automation' scale used to measure trust. All items use a 7-point Likert scale. These questions are derived from the work by Jian et. al.~\cite{jian2000foundations}}

\begin{tabular}{ll}

\hline

\# & Question \\ \hline

Q1 & The system is deceptive \\

Q2 & The system behaves in an underhanded manner \\

Q3 & I am suspicious of the system’s intent, action, or outputs \\

Q4 & I am wary of the system \\

Q5 & The system’s actions will have a harmful or injurious outcome \\

Q6 & I am confident in the system \\

Q7 & The system provides security \\

Q8 & The system has integrity \\

Q9 & The system is dependable \\

Q10 & The system is reliable \\

Q11 & I can trust the system \\

Q12 & I am familiar with the system \\ \hline

\end{tabular}

\label{table:trustquestions}

\end{table}
